# Supplementary material for: Vitamin D attenuates airway mucus hypersecretion in mild chronic obstructive pulmonary disease by regulating autophagy via the mTOR signaling pathway
Source: Research Square preprint supplement (doi:10.21203/rs.3.rs-6611378/v1), 2025-07-02
Supplement: Supplementary file 1 [file 320d507cc084e69bb8680c9b.docx]

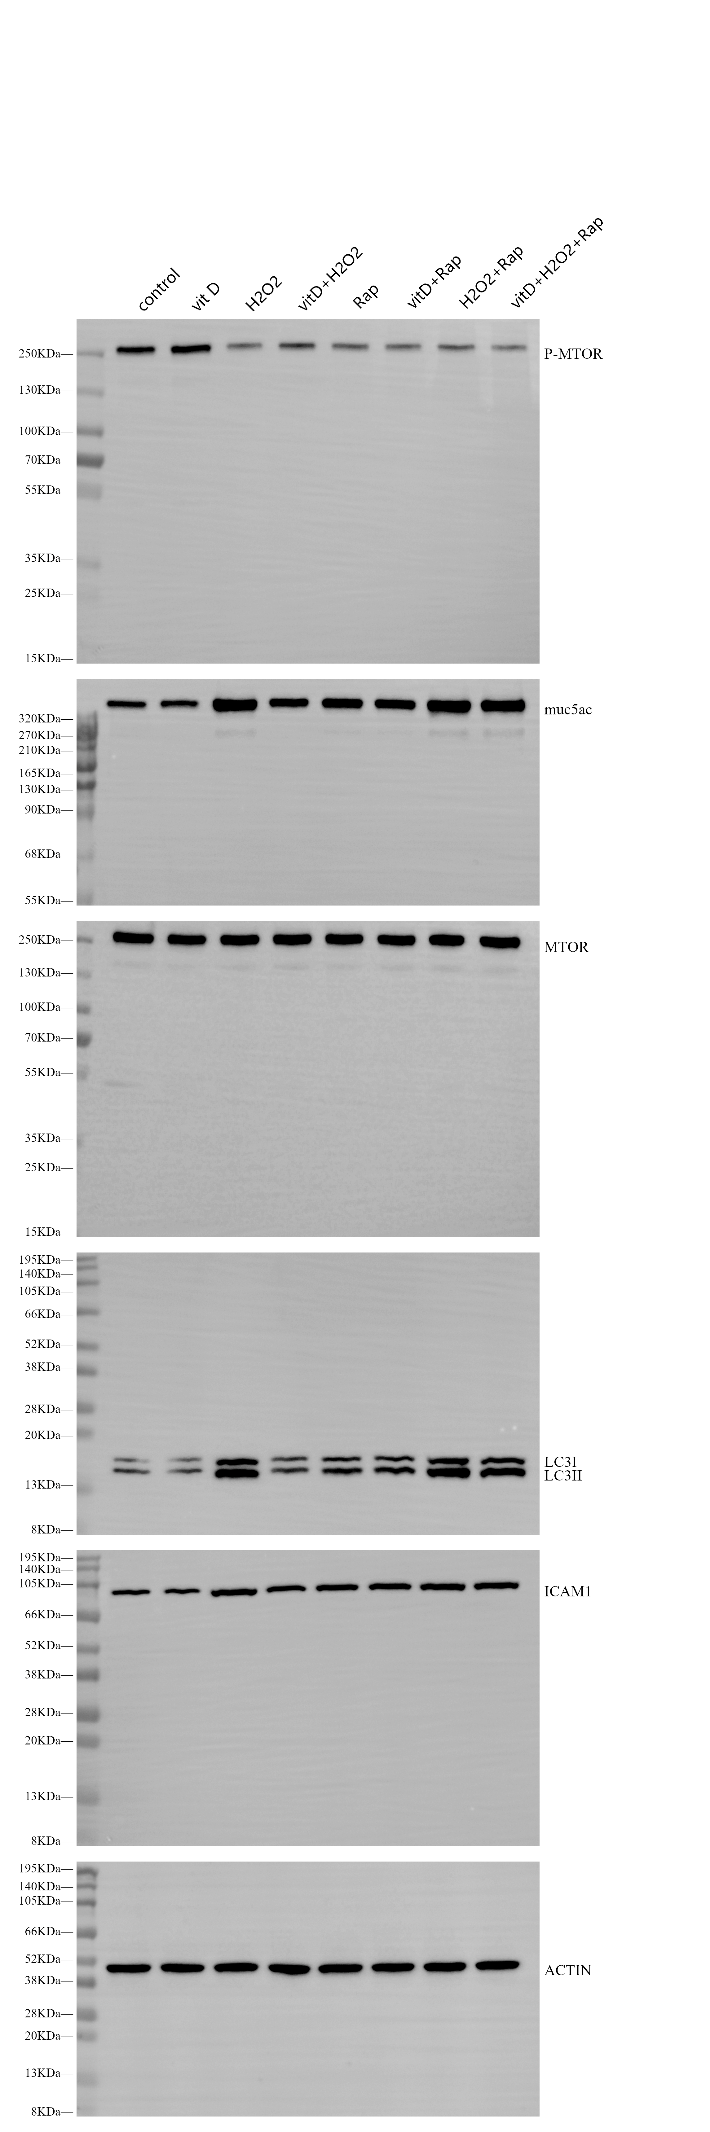


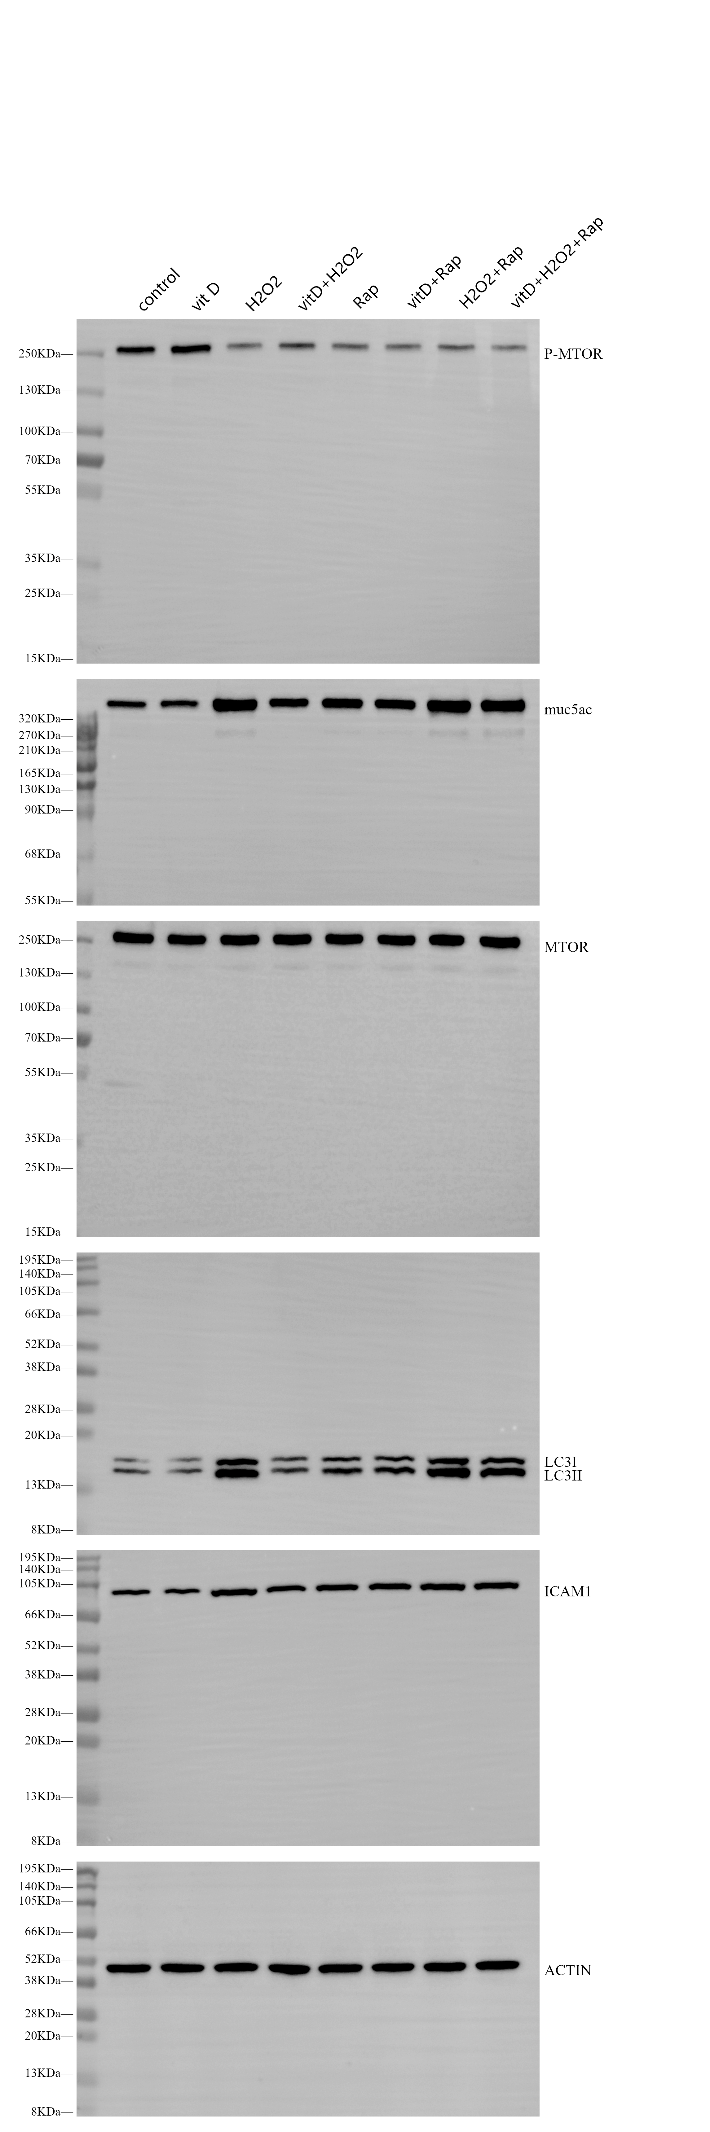


**Figure 7B-E** (B)Western blot analysis of autophagy-related protein LC3II expression after H₂O₂ and 1,25(OH)₂D₃ treatment with or without rapamycin. (C) Western blot analysis of MUC5AC expression after H₂O₂ and 1,25(OH)₂D₃ treatment with or without rapamycin. (E) Western blot analysis of p-mTOR expression after H₂O₂ and 1,25(OH)₂D₃ treatment with or without rapamycin. The experiment was performed in triplicate.

Rap, rapamycin; Vit D, 1,25(OH)₂D₃.


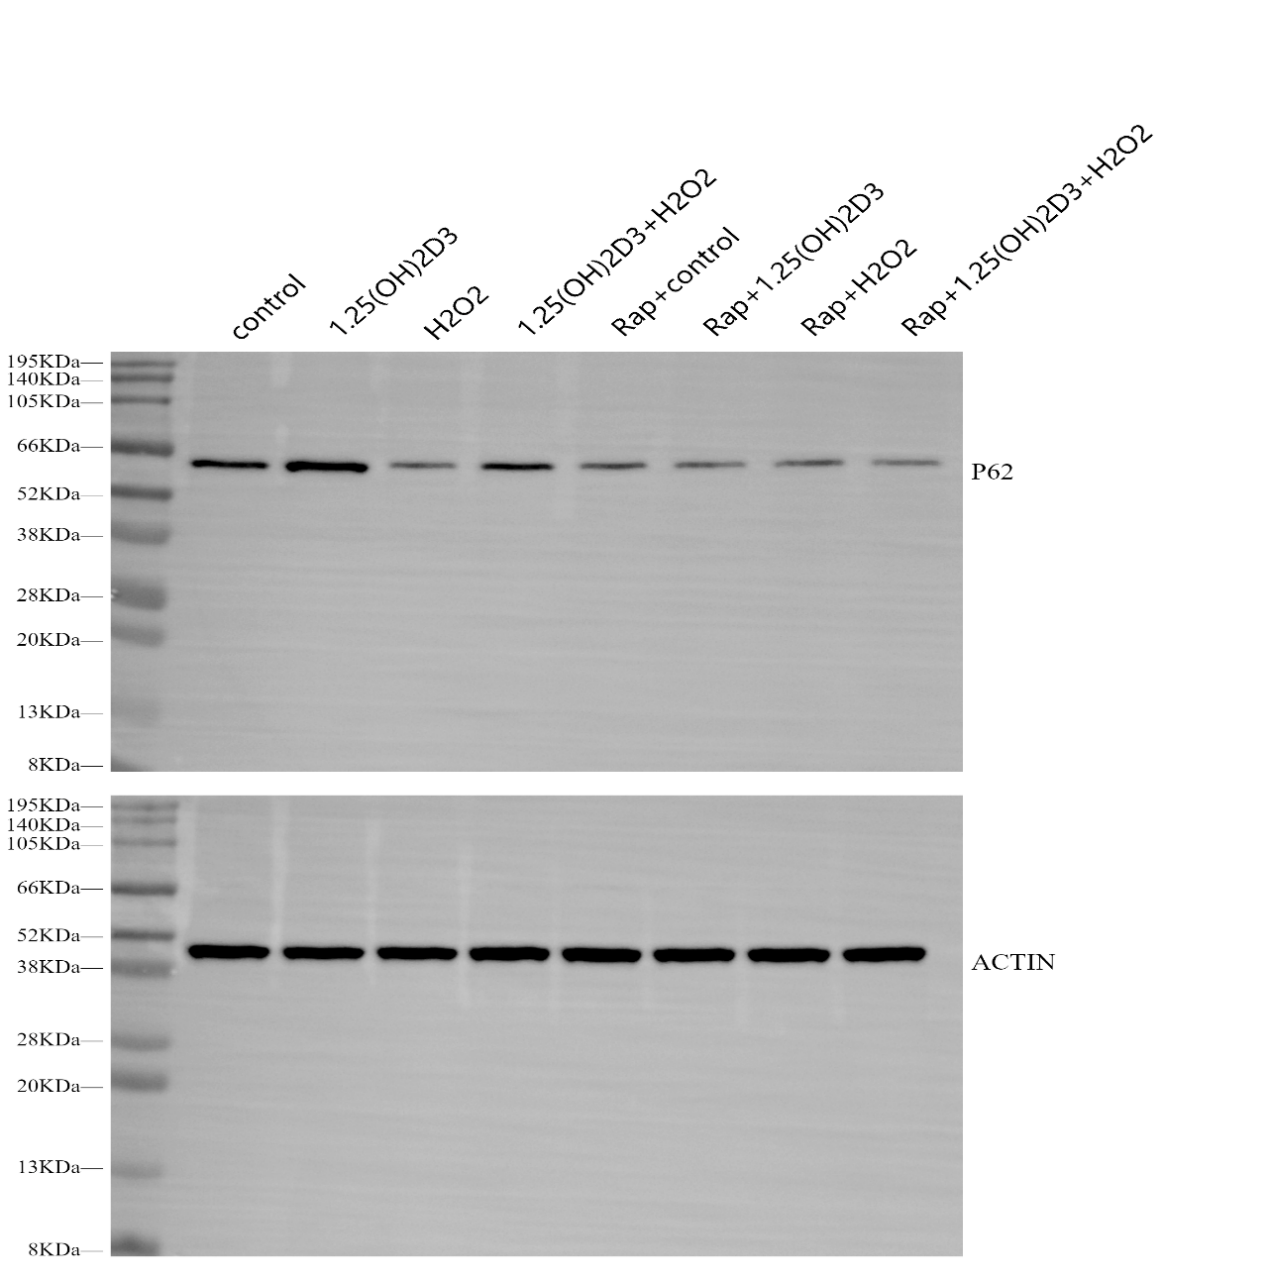


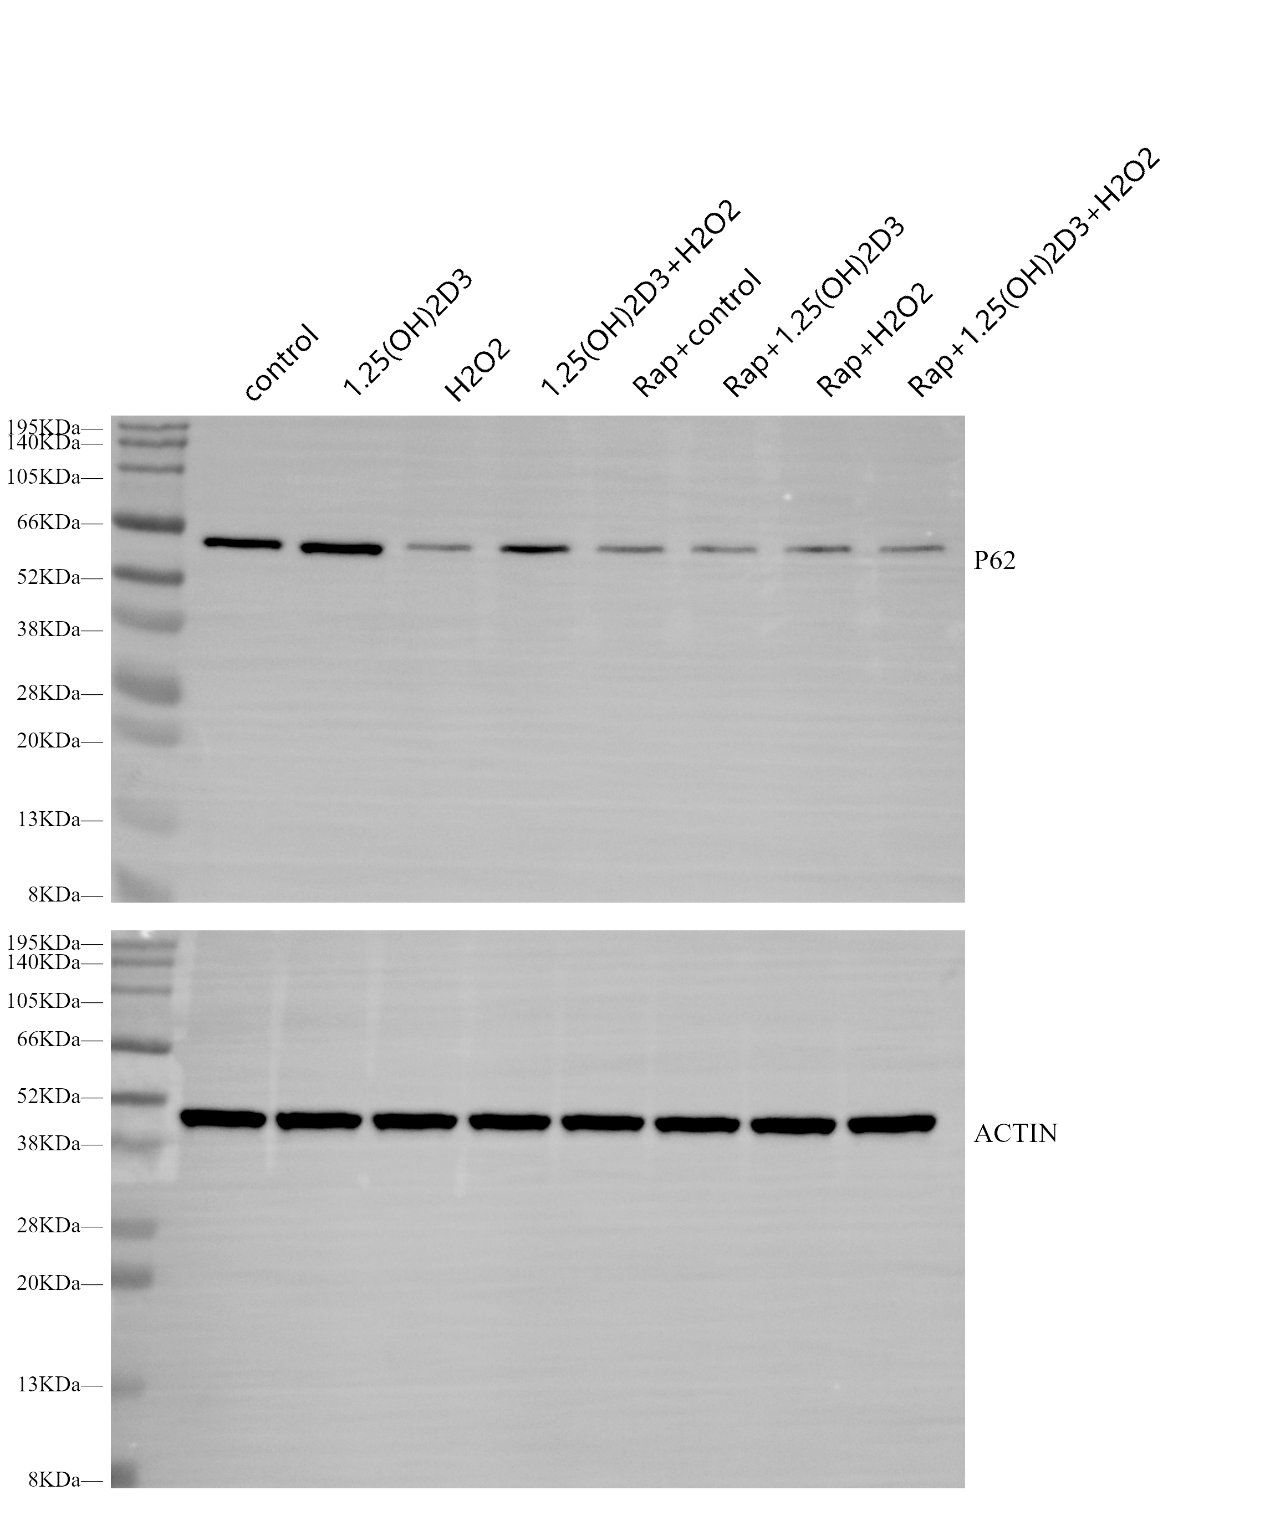


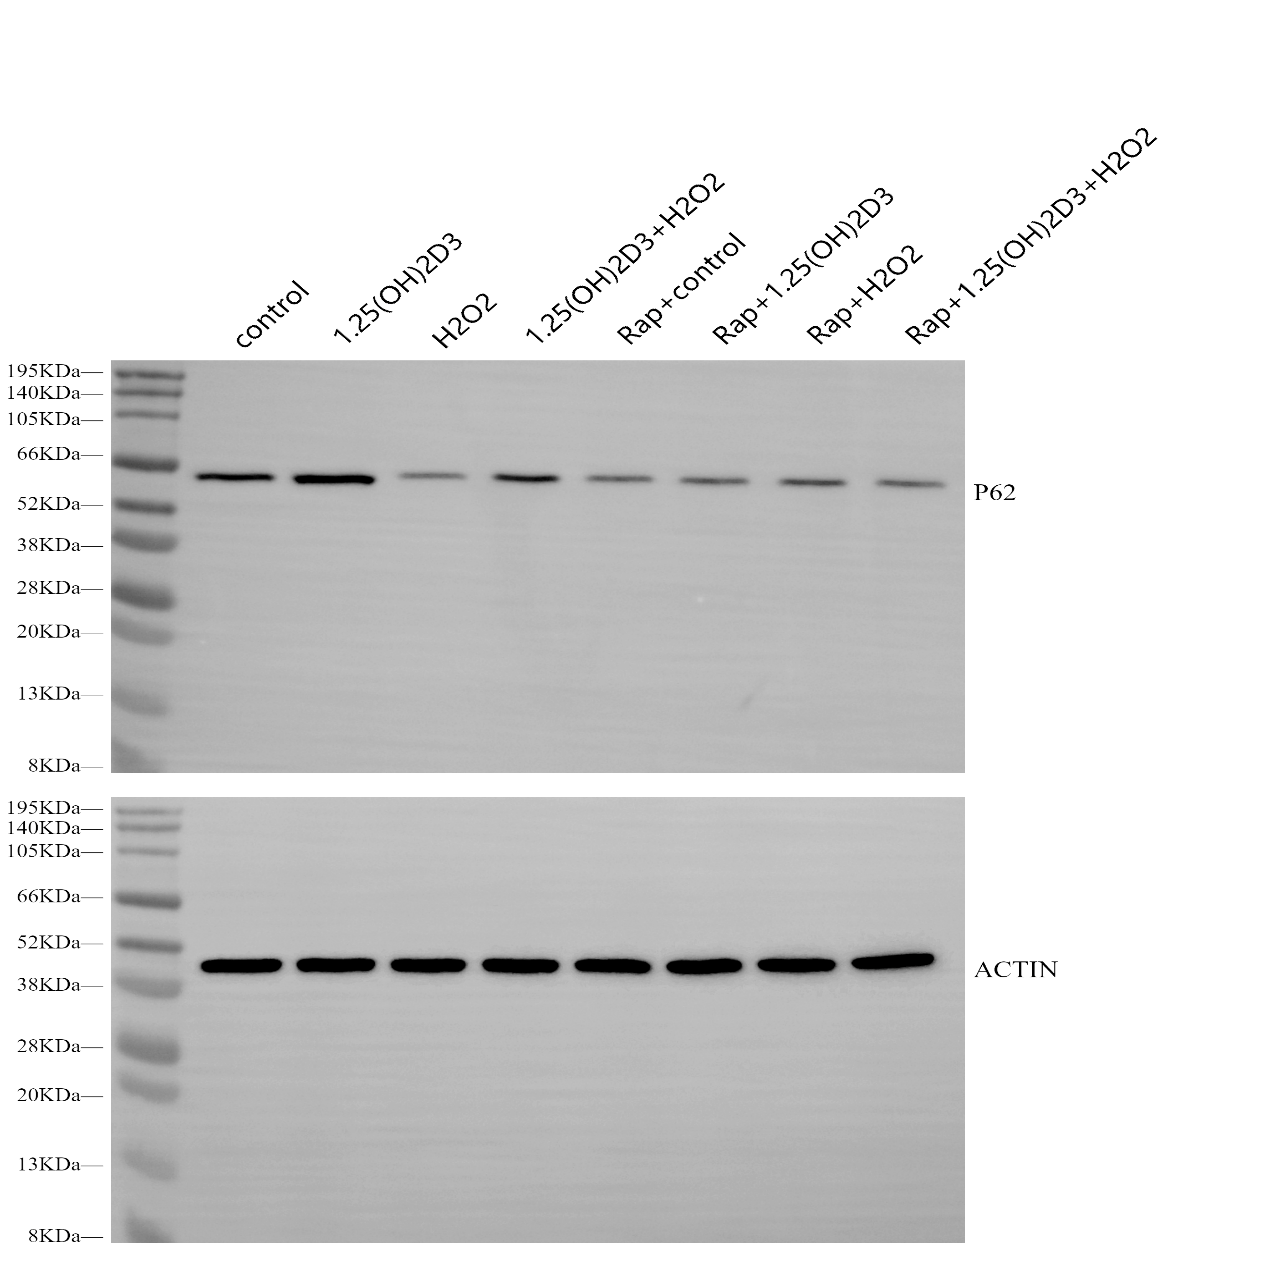


**Figure 7D** Western blot analysis of autophagy-related protein p62 expression after H₂O₂ and 1,25(OH)₂D₃ treatment with or without rapamycin. p62 expression levels were normalized to ACTIN. The experiment was performed in triplicate.

Rap, rapamycin.
